# Supplementary material
Source: Springer Nature journal article supplement (https://www.springermedizin.de/resource/supplementary/12889_2014_7392_MOESM5_ESM.docx/9497314)

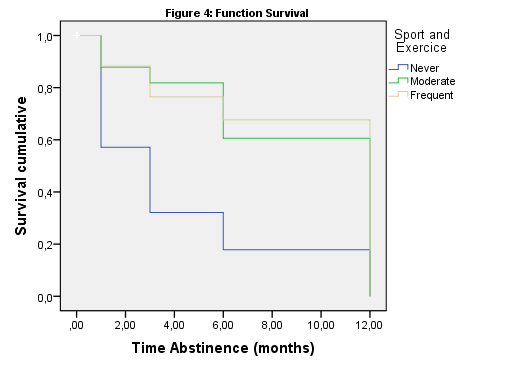

Supplement: MOESM5 [file 9497314]
